# Supplementary material for: Prioritizing network communities
Source: PubMed Central journal article supplement (PMC6026212; doi:10.1038/s41467-018-04948-5), 2018-06-29
Supplement: 41467_2018_4948_MOESM2_ESM.pdf [file 41467_2018_4948_MOESM2_ESM.pdf]

## **Description of Additional Supplementary Files**

File Name: Supplementary Data 1

Description: Supplementary Data 1 with prioritization results for the medical drug network
